# Supplementary material
Source: PubMed Central journal article supplement (PMC2667721)
Supplement: M808840200_1.pdf [file M808840200_1.pdf]

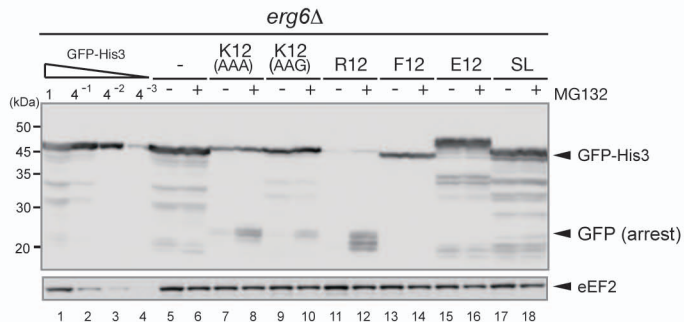

Cell extracts of W303*erg6* $\Delta$  harboring indicated plasmids were prepared. When indicated (+), cell extracts were prepared 2 hrs after the addition of 0.1 mM MG132.
