# Supplementary material
Source: PubMed Central journal article supplement (PMC2667721)
Supplement: M808840200_2.pdf [file M808840200_2.pdf]

**Supplementary table 1**  
**Yeast strains and plasmids used in this study**

| Strain/plasmids | Genotype[plasmid](plasmid number)                                | Source                             |
|-----------------|------------------------------------------------------------------|------------------------------------|
| <b>Strains</b>  |                                                                  |                                    |
| W303-1a         | <i>MATa ade2 his3 leu2 trp1 ura3 can1</i>                        | Lab stock                          |
| YNK7            | <i>MATa leu2 trp1 his3 ura3 ssd1 can1 ade2 rpn6::rpn6-2-URA3</i> | Isono <i>et al.</i> , 2005         |
| YIT2001         | W303-1a <i>not3Δ::kanMX</i>                                      | This study                         |
| YIT2002         | W303-1a <i>not4Δ::kanMX</i>                                      | This study                         |
| YIT2003         | W303-1a <i>not5Δ::kanMX</i>                                      | This study                         |
| <b>plasmids</b> |                                                                  |                                    |
| pSA144          | <i>pGPDp-GFP-FLAG-HIS3-CYC1ter</i>                               | Ito-Harashima <i>et al.</i> , 2007 |
| pSA156          | <i>yCplac33 pGPDp-GFP-FLAG-HIS3</i>                              | Ito-Harashima <i>et al.</i> , 2007 |
| pSA157          | <i>yCplac33 pGPDp-GFP-FLAG-HIS3-NS</i>                           | Ito-Harashima <i>et al.</i> , 2007 |
| pIT2001         | <i>pGPD-GFP-K12(AAG)-FLAG-HIS3</i>                               | This study                         |
| pIT2002         | <i>pGPD-GFP-K12(AAAAAG)-FLAG-HIS3</i>                            | This study                         |
| pIT2003         | <i>pGPD-GFP-K12(AAAAAG)-FS-FLAG-HIS3</i>                         | This study                         |
| pIT2004         | <i>pGPD-GFP-R12-FLAG-HIS3</i>                                    | This study                         |
| pIT2005         | <i>pGPD-GFP-R12-FS-FLAG-HIS3</i>                                 | This study                         |
| pIT2006         | <i>pGPD-GFP-(RK)6-FLAG-HIS3</i>                                  | This study                         |
| pIT2007         | <i>pGPD-GFP-F12-FLAG-HIS3</i>                                    | This study                         |
| pIT2008         | <i>pGPD-GFP-E12-FLAG-HIS3</i>                                    | This study                         |
| pIT2009         | <i>pGPD-GFP-L12-FLAG-HIS3</i>                                    | This study                         |
| pIT2010         | <i>pGPD-GFP-I12-FLAG-HIS3</i>                                    | This study                         |
| pIT2011         | <i>pGPD-GFP-M12-FLAG-HIS3</i>                                    | This study                         |
| pIT2012         | <i>pGPD-GFP-V12-FLAG-HIS3</i>                                    | This study                         |
| pIT2013         | <i>pGPD-GFP-S12-FLAG-HIS3</i>                                    | This study                         |
| pIT2014         | <i>pGPD-GFP-P12-FLAG-HIS3</i>                                    | This study                         |
| pIT2015         | <i>pGPD-GFP-T12-FLAG-HIS3</i>                                    | This study                         |
| pIT2016         | <i>pGPD-GFP-A12-FLAG-HIS3</i>                                    | This study                         |
| pIT2017         | <i>pGPD-GFP-Y12-FLAG-HIS3</i>                                    | This study                         |
| pIT2018         | <i>pGPD-GFP-H12-FLAG-HIS3</i>                                    | This study                         |
| pIT2019         | <i>pGPD-GFP-N12-FLAG-HIS3</i>                                    | This study                         |
| pIT2020         | <i>pGPD-GFP-D12-FLAG-HIS3</i>                                    | This study                         |
| pIT2021         | <i>pGPD-GFP-C12-FLAG-HIS3</i>                                    | This study                         |
| pIT2022         | <i>pGPD-GFP-W12-FLAG-HIS3</i>                                    | This study                         |
| pIT2023         | <i>pGPD-GFP-Q12-FLAG-HIS3</i>                                    | This study                         |
| pIT2024         | <i>pGPD-GFP-G12-FLAG-HIS3</i>                                    | This study                         |
| pIT2025         | <i>pGPD-GFP-W12-FS-FLAG-HIS3</i>                                 | This study                         |
| pIT2026         | <i>pGPD-GFP-JJ1-FLAG-HIS3</i>                                    | This study                         |
| pIT2027         | <i>pGPD-GFP-HMO1-FLAG-HIS3</i>                                   | This study                         |
| pIT2028         | <i>pGPD-GFP-UTP23-FLAG-HIS3</i>                                  | This study                         |
| pIT2029         | <i>pGPD-GFP-MAP23-FLAG-HIS3</i>                                  | This study                         |
| pIT2030         | <i>pGPD-GFP-RMP1-FLAG-HIS3</i>                                   | This study                         |
| pIT2031         | <i>p415ADH1p-NOT4</i>                                            | This study                         |
| pIT2032         | <i>p415ADH1p-NOT4L35</i>                                         | This study                         |
| pIT2033         | <i>p415ADH1p-FLAG-NOT4</i>                                       | This study                         |
