# Supplementary material
Source: PubMed Central journal article supplement (PMC2667721)
Supplement: M808840200_3.pdf [file M808840200_3.pdf]

**Supplementary Table2 List of oligonucleotides**

| consecutive amino acids | oligonucleotides sequences                                                                                   |
|-------------------------|--------------------------------------------------------------------------------------------------------------|
| K (AAA)                 | 5' -CTAGCAAAAAAAAAAAAAAAAAAAAAAAAAAAAAAAAAAAAA-3'<br>5' -CTAGTTTTTTTTTTTTTTTTTTTTTTTTTTTTTTTTTTTTTTG-3'      |
| K (AAG)                 | 5' -CTAGCAAGAAGAAGAAGAAGAAGAAGAAGAAGAAGA-3'<br>5' -CTAGTCTTCTTCTTCTTCTTCTTCTTCTTCTTCTTCTTG-3'                |
| K (AAAAAG)              | 5' -CTAGCAAGAAAAAGAAAAAGAAAAAGAAAAAGAAAAAGAAA-3'<br>5' -CTAGTTTTCTTTTTCTTTTTCTTTTTCTTTTTCTTTTTCTTG-3'        |
| K (AAAAAG) -FS          | 5' -CTAGCCAAGAAAAAGAAAAAGAAAAAGAAAAAGAAAAAGAAAGGA-3'<br>5' -CTAGTCCTTCTTTTTCTTTTTCTTTTTCTTTTTCTTTTTCTTGG-3'  |
| R                       | 5' -CTAGCCGGCGACGACGGCGCCGCGGCGACGACGGCGCCGCA-3'<br>5' -CTAGTGGCGGCGCGTCTGTCGCGGCGGCGCGCGTCTGCGCCG-3'        |
| R-FS                    | 5' -CTAGCCCCGGCGACGACGGCGCCGCGGCGACGACGGCGCCGCA-3'<br>5' -CTAGTGGCGGCGCGTCTGTCGCGGCGGCGCGCGTCTGCGCCGGG-3'    |
| (RK) 6                  | 5' -CTAGCAAAAGAAAGCGAAAGCGCAAACGGAAGCGTAAAAGAA-3'<br>5' -CTAGTTCCTTTACGCTTCCGTTTGCCTTTCGCTTCTTTTTTG-3'       |
| F                       | 5' -CTAGCTTTTTCTTCTTCTTTTTTTTTCTTCTTCTTTTTCTTCA-3'<br>5' -CTAGTGAAGAAAAAGAAGAAGAAAAAAAAGAAGAAGAAAAAG-3'      |
| E                       | 5' -CTAGCGAGGAAGAGGAAGAGGAAGAGGAAGAGGAAGAGGAAA-3'<br>5' -CTAGTTTCTTCTTCTTCTTCTTCTTCTTCTTCTTCTTCTCG-3'        |
| L                       | 5' -CTAGCCTTCTCCTACTGCTTCTCCTACTGCTTCTCCTACTGA-3'<br>5' -CTAGTCAGTAGGAGAAGCAGTAGGAGAAGCAGTAGGAGAAGG-3'       |
| I                       | 5' -CTAGCATTATCATCATAATTATCATCATAATTATCATCATAA-3'<br>5' -CTAGTTATGATGATAATTATGATGATAATTATGATGATAATG-3'       |
| M                       | 5' -CTAGCATGATGATGATGATGATGATGATGATGATGATGATGA-3'<br>5' -CTAGTCATCATCATCATCATCATCATCATCATCATCATCATG-3'       |
| V                       | 5' -CTAGCGTTGTCGTAGTGGTTGTCGTAGTGGTTGTCGTAGTGA-3'<br>5' -CTAGTCACTACGACAACCACTACGACAACCACTACGACAACG-3'       |
| S                       | 5' -CTAGCTCTTCTCCTCATCGTCTTCTCCTCATCGTCTTCTCCTCGA-3'<br>5' -CTAGTCGATGAGGAAGACGATGAGGAAGACGATGAGGAAGAG-3'    |
| P                       | 5' -CTAGCCCTCCCCACCGCTCCCCACCGCTCCCCACCGA-3'<br>5' -CTAGTCGGTGGGGGAGGCGGTGGGGGAGGCGGTGGGGGAGGG-3'            |
| T                       | 5' -CTAGCACTACCACAACGACTACCACAACGACTACCACAACGA-3'<br>5' -CTAGTCGTTGTGGTAGTCGTTGTGGTAGTCGTTGTGGTAGTG-3'       |
| A                       | 5' -CTAGCGCTGCCGAGCGGCTGCCGAGCGGCTGCCGAGCGA-3'<br>5' -CTAGTCGCTGCCGAGCGGCTGCCGAGCGGCTGCCGAGCG-3'             |
| Y                       | 5' -CTAGCTATTACTATTACTATTACTATTACTATTACTATTACA-3'<br>5' -CTAGTGTAAAGTAATAGTAATAGTAATAGTAATAGTAATAG-3'        |
| H                       | 5' -CTAGCCATCACCATCACCATCACCATCACCATCACCATCACA-3'<br>5' -CTAGTGTGATGGTGATGGTGATGGTGATGGTGATGGTGATGG-3'       |
| N                       | 5' -CTAGCAATAACAATAACAATAACAATAACAATAACAATAACA-3'<br>5' -CTAGTGTATTGTTATTGTTATTGTTATTGTTATTGTTATTG-3'        |
| D                       | 5' -CTAGCGATGACGATGACGATGACGATGACGATGACGATGACA-3'<br>5' -CTAGTGTATCGTCATCGTCATCGTCATCGTCATCGTCATCG-3'        |
| C                       | 5' -CTAGCTGTTGCTGTTGCTGTTGCTGTTGCTGTTGCTGTTGCA-3'<br>5' -CTAGTGCAACAGCAACAGCAACAGCAACAGCAACAGCAACAG-3'       |
| W                       | 5' -CTAGCTGGTGGTGGTGGTGGTGGTGGTGGTGGTGGTGGTGGGA-3'<br>5' -CTAGTCCACCACCACCACCACCACCACCACCACCACCACCAG-3'      |
| Q                       | 5' -CTAGCCAACAGCAACAGCAACAGCAACAGCAACAGCAACAGA-3'<br>5' -CTAGTCTGTTGCTGTTGCTGTTGCTGTTGCTGTTGCTGTTGG-3'       |
| G (Gly)                 | 5' -CTAGCGGTGGCGGAGGGGGTGGCGGAGGGGGTGGCGGAGGGA-3'<br>5' -CTAGTCCCTCCGCCACCCCTCCGCCACCCCTCCGCCACCG-3'         |
| W-FS                    | 5' -CTAGCCTGGTGGTGGTGGTGGTGGTGGTGGTGGTGGTGGTGGCCA-3'<br>5' -CTAGTGGCCACCACCACCACCACCACCACCACCACCACCACCAGG-3' |
| SL                      | 5' -GATCCGATATCCCGTGGAGGGGCGGCGTGGTGGCGGCTGCAGCC<br>GCCACCACGCGCCCTCCACGGGATATCG-3'                          |
